# Supplementary material for: The ESCRT-III isoforms CHMP2A and CHMP2B display different effects on membranes upon polymerization
Source: PubMed Central journal article supplement (PMC8033747; doi:10.1186/s12915-021-00983-9), 2021-04-08
Supplement: 12915_2021_983_MOESM1_ESM.pdf [file 12915_2021_983_MOESM1_ESM.pdf]

**SUPPLEMENTARY 1**

**A**

| ESCRT complex | Proposed Function    | Evolutionary origin | Yeast                          | Human                                       |
|---------------|----------------------|---------------------|--------------------------------|---------------------------------------------|
| ESCRT -III    | Membrane remodelling | Archaea             | Vps20<br>Snf7<br>Vps24<br>Vps2 | CHMP6<br>CHMP4A, B, C<br>CHMP3<br>CHMP2A, B |

**B**

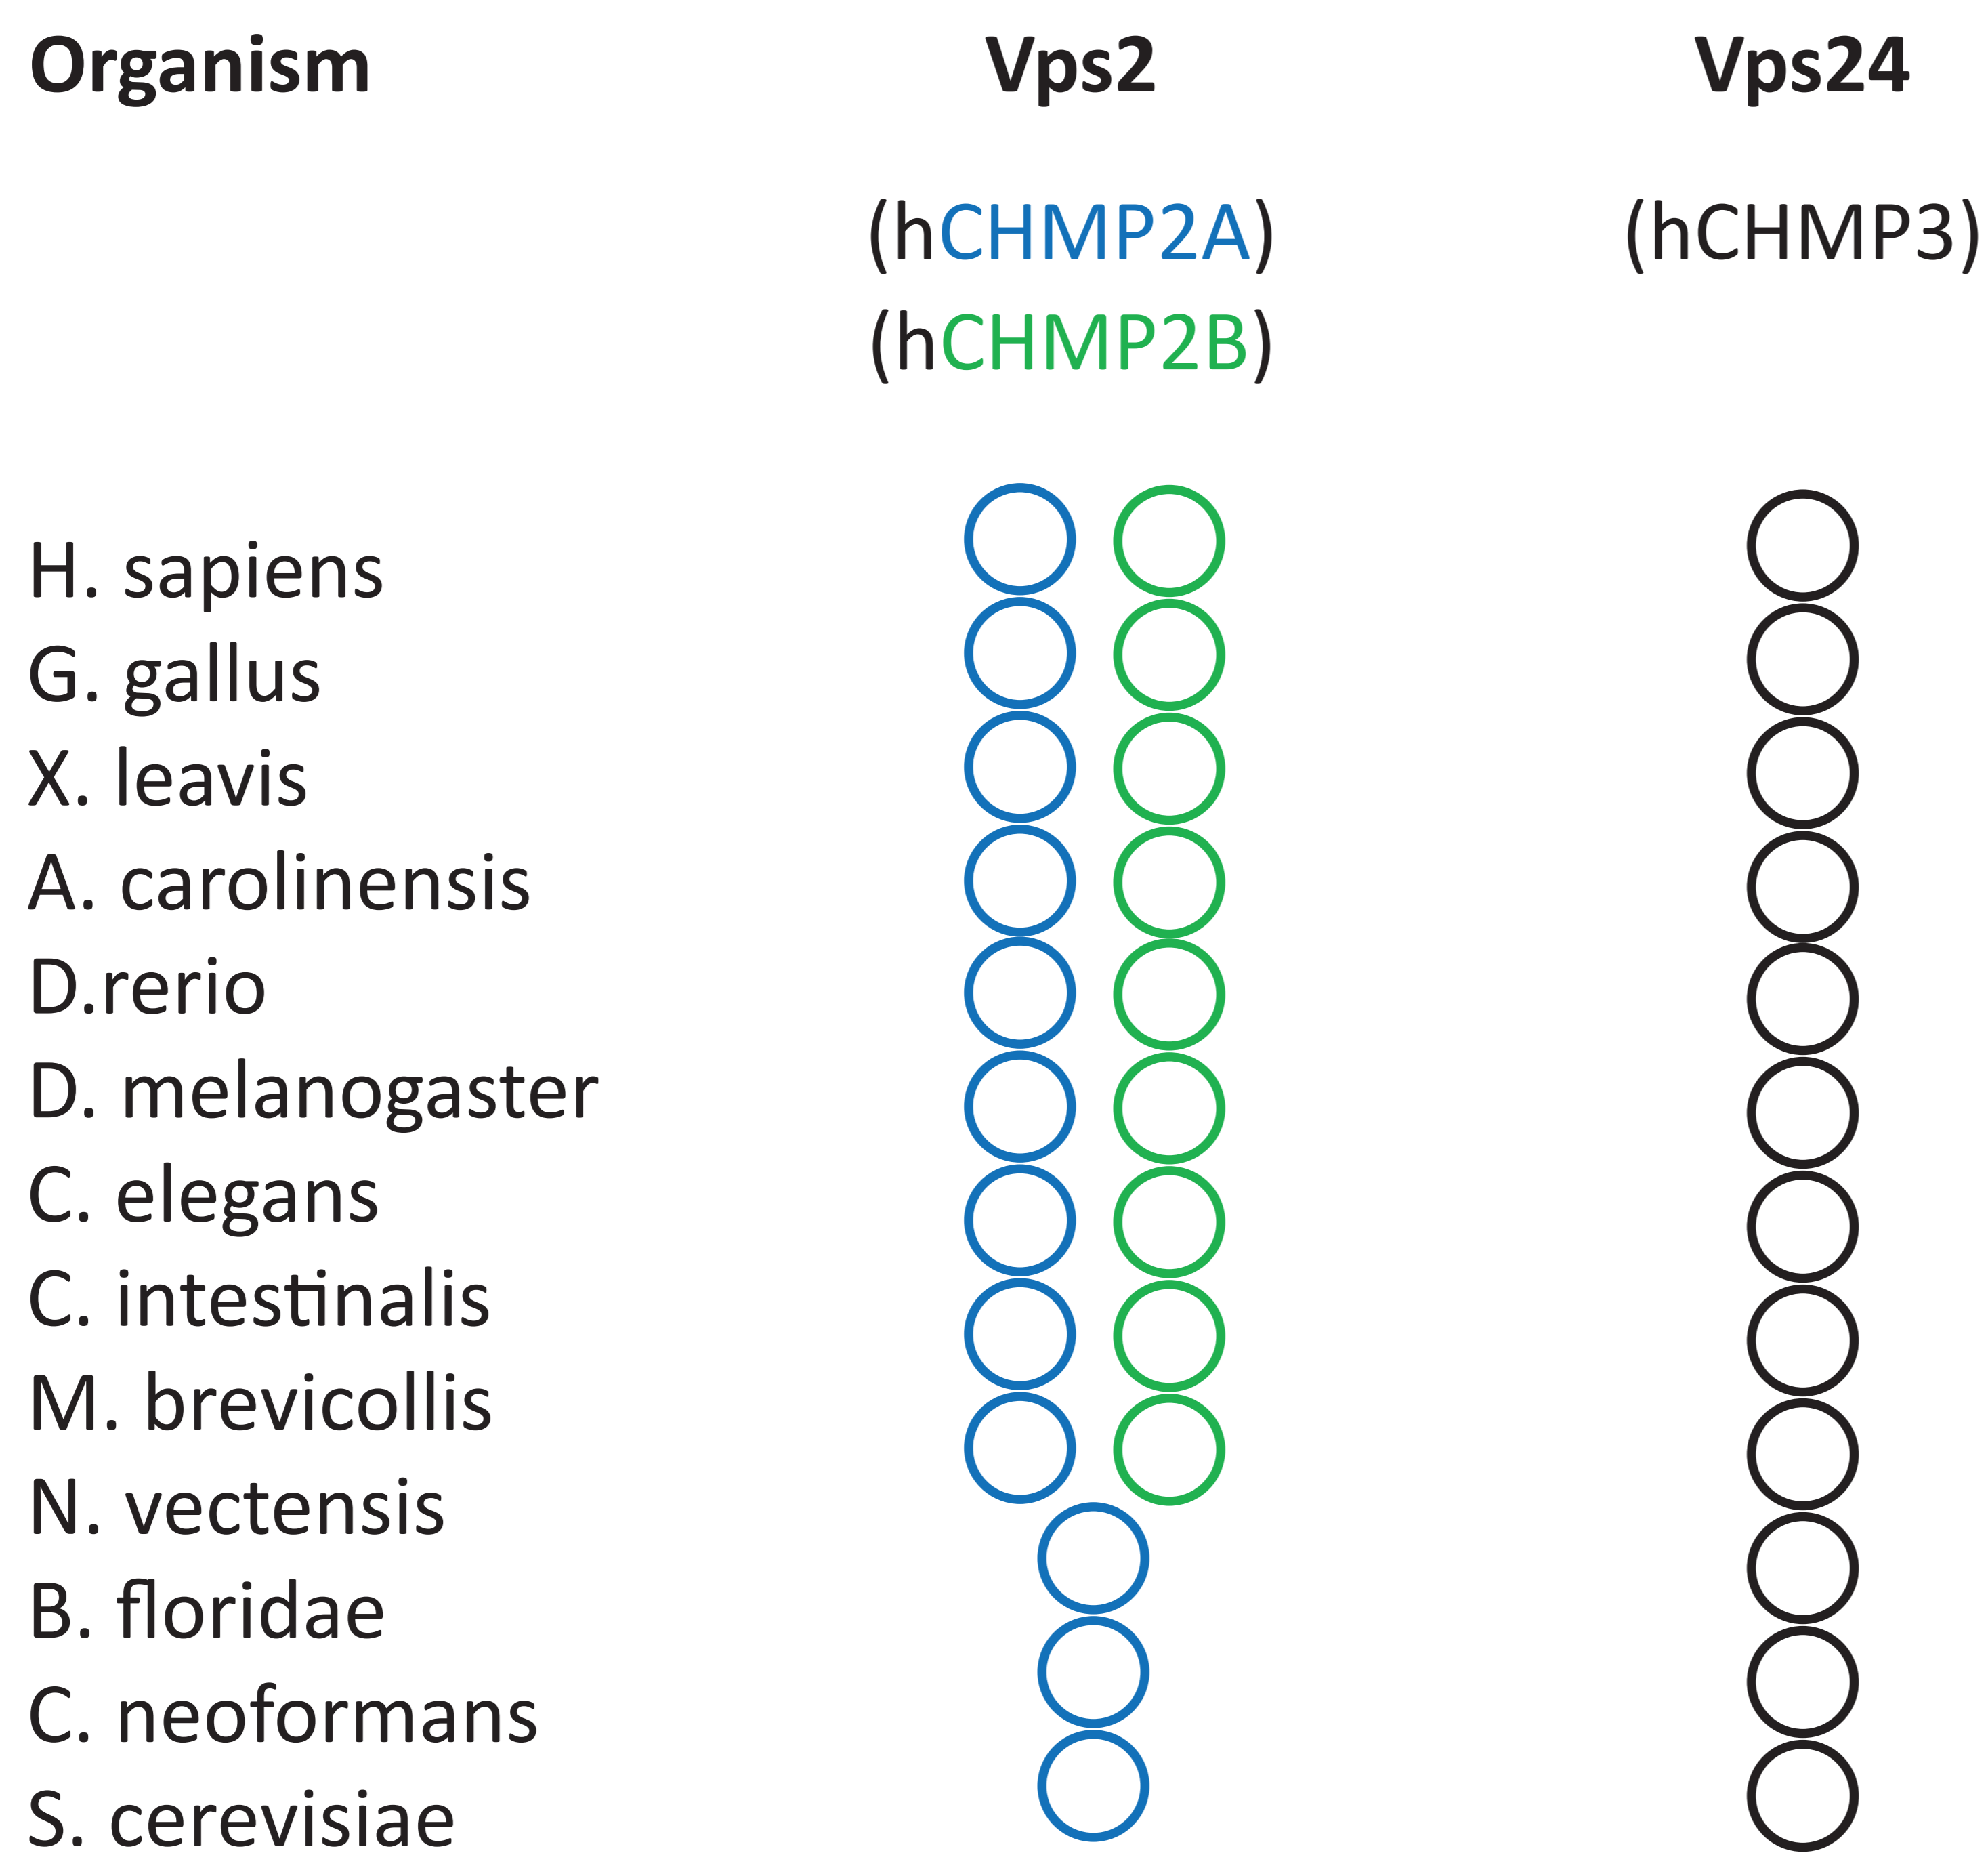

**C**

| Cellular process      | Organism                    | ESCRT -III core components        |
|-----------------------|-----------------------------|-----------------------------------|
| MVB formation         | S. cerevisiae<br>H. sapiens | CHMP4B - CHMP3<br>CHMP2A          |
| Cytokinesis           | H. sapiens                  | CHMP4B - CHMP3<br>CHMP2A - CHMP2B |
| HIV-1 budding         | H. sapiens                  | CHMP4B - CHMP3<br>CHMP2A - CHMP2B |
| Neurone severing      | H. sapiens                  | CHMP4B - CHMP3<br>CHMP2A - CHMP2B |
| Pasma membrane repair | H. sapiens                  | CHMP4B - CHMP3<br>CHMP2A - CHMP2B |
