# Supplementary material for: The ESCRT-III isoforms CHMP2A and CHMP2B display different effects on membranes upon polymerization
Source: PubMed Central journal article supplement (PMC8033747; doi:10.1186/s12915-021-00983-9), 2021-04-08

SUPPLEMENTARY 3

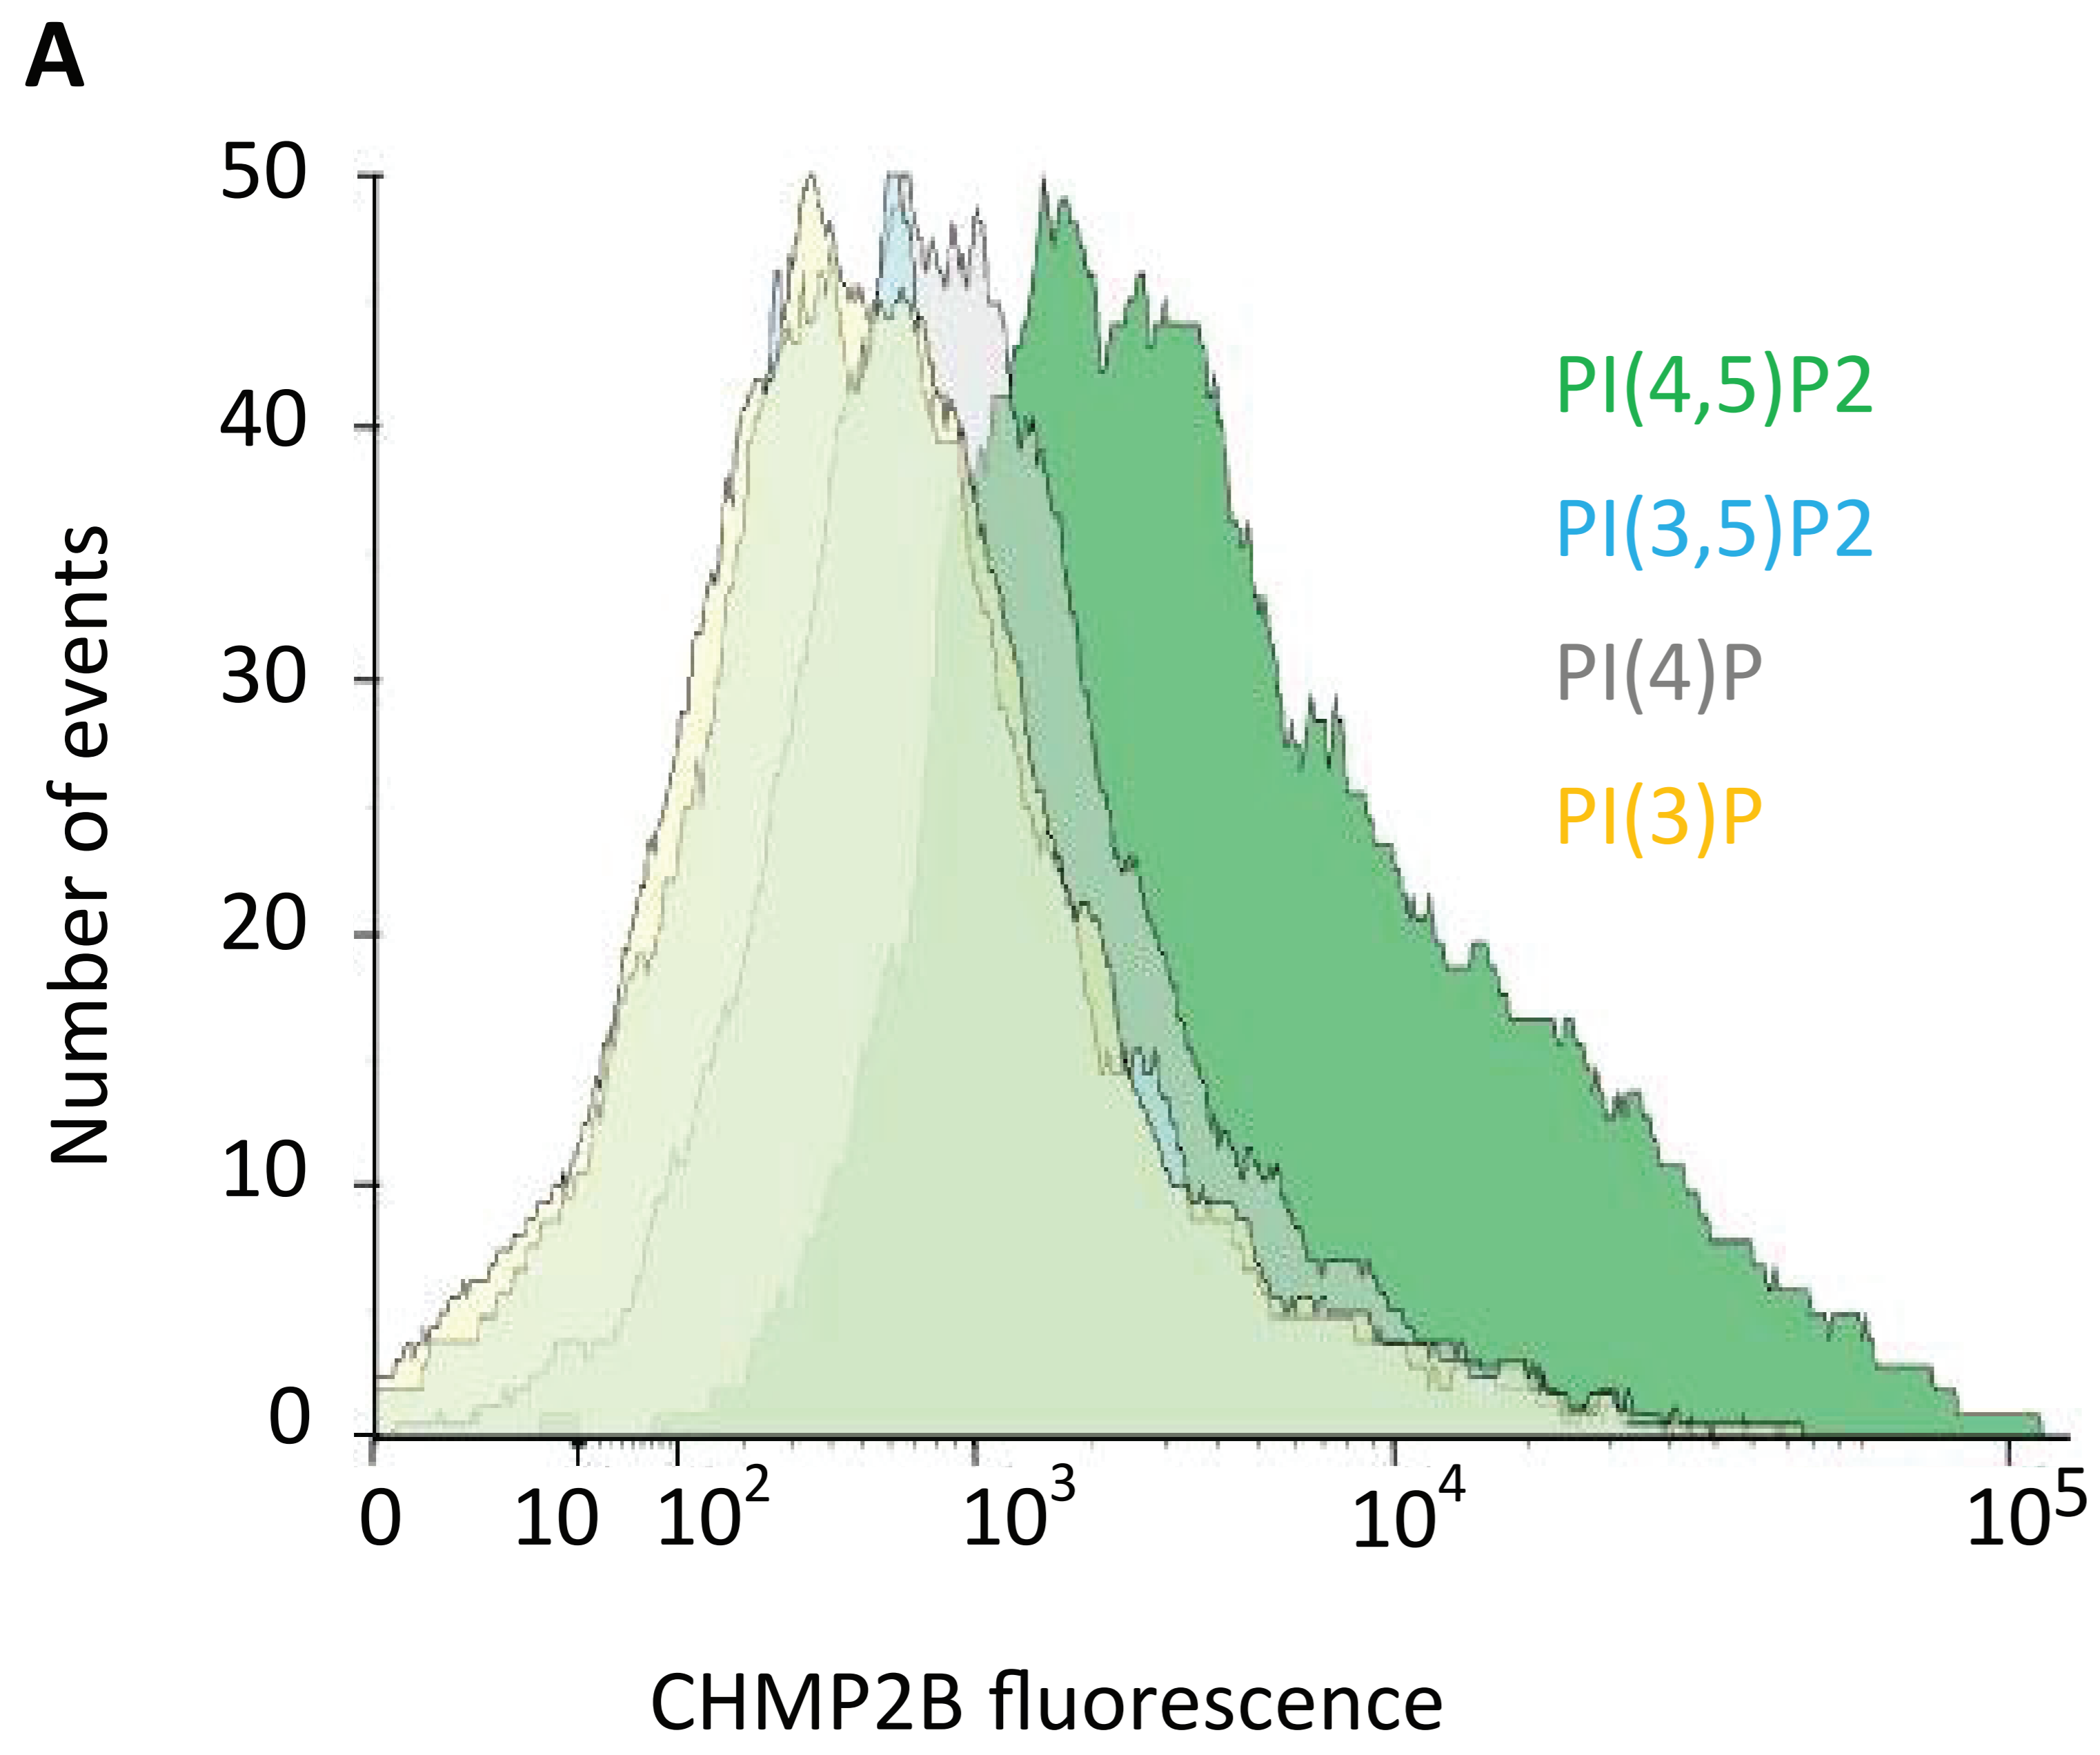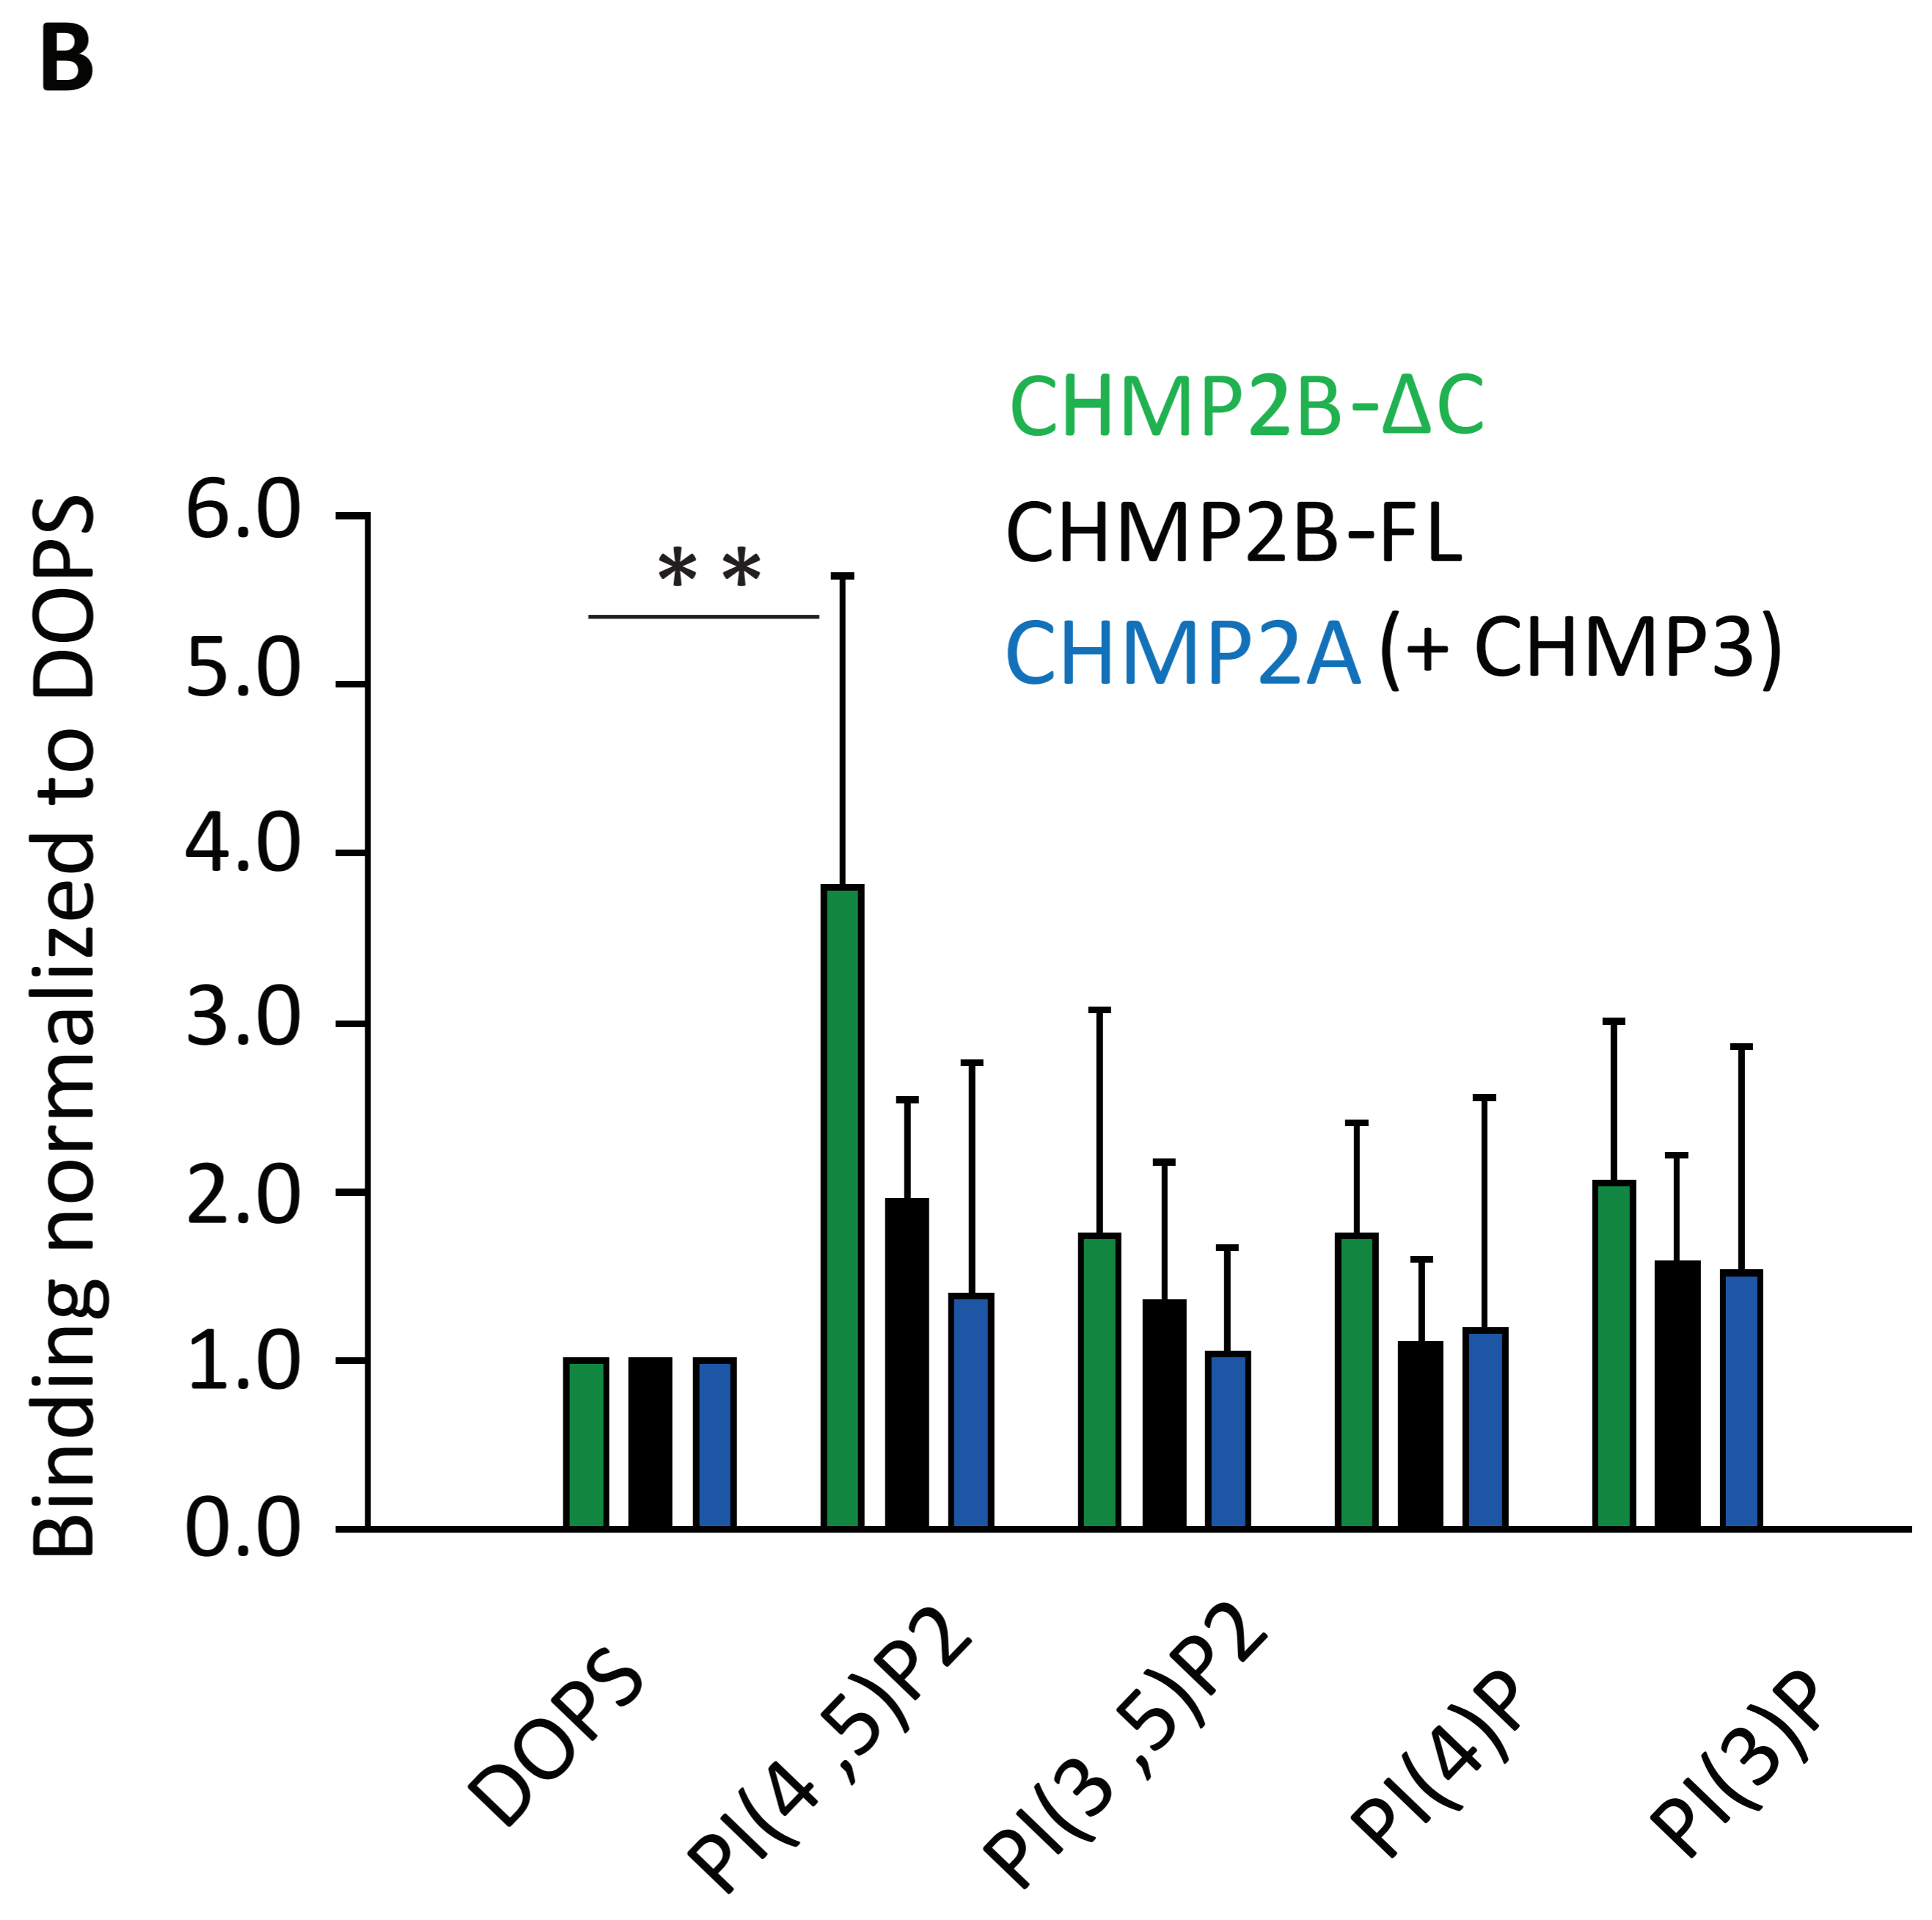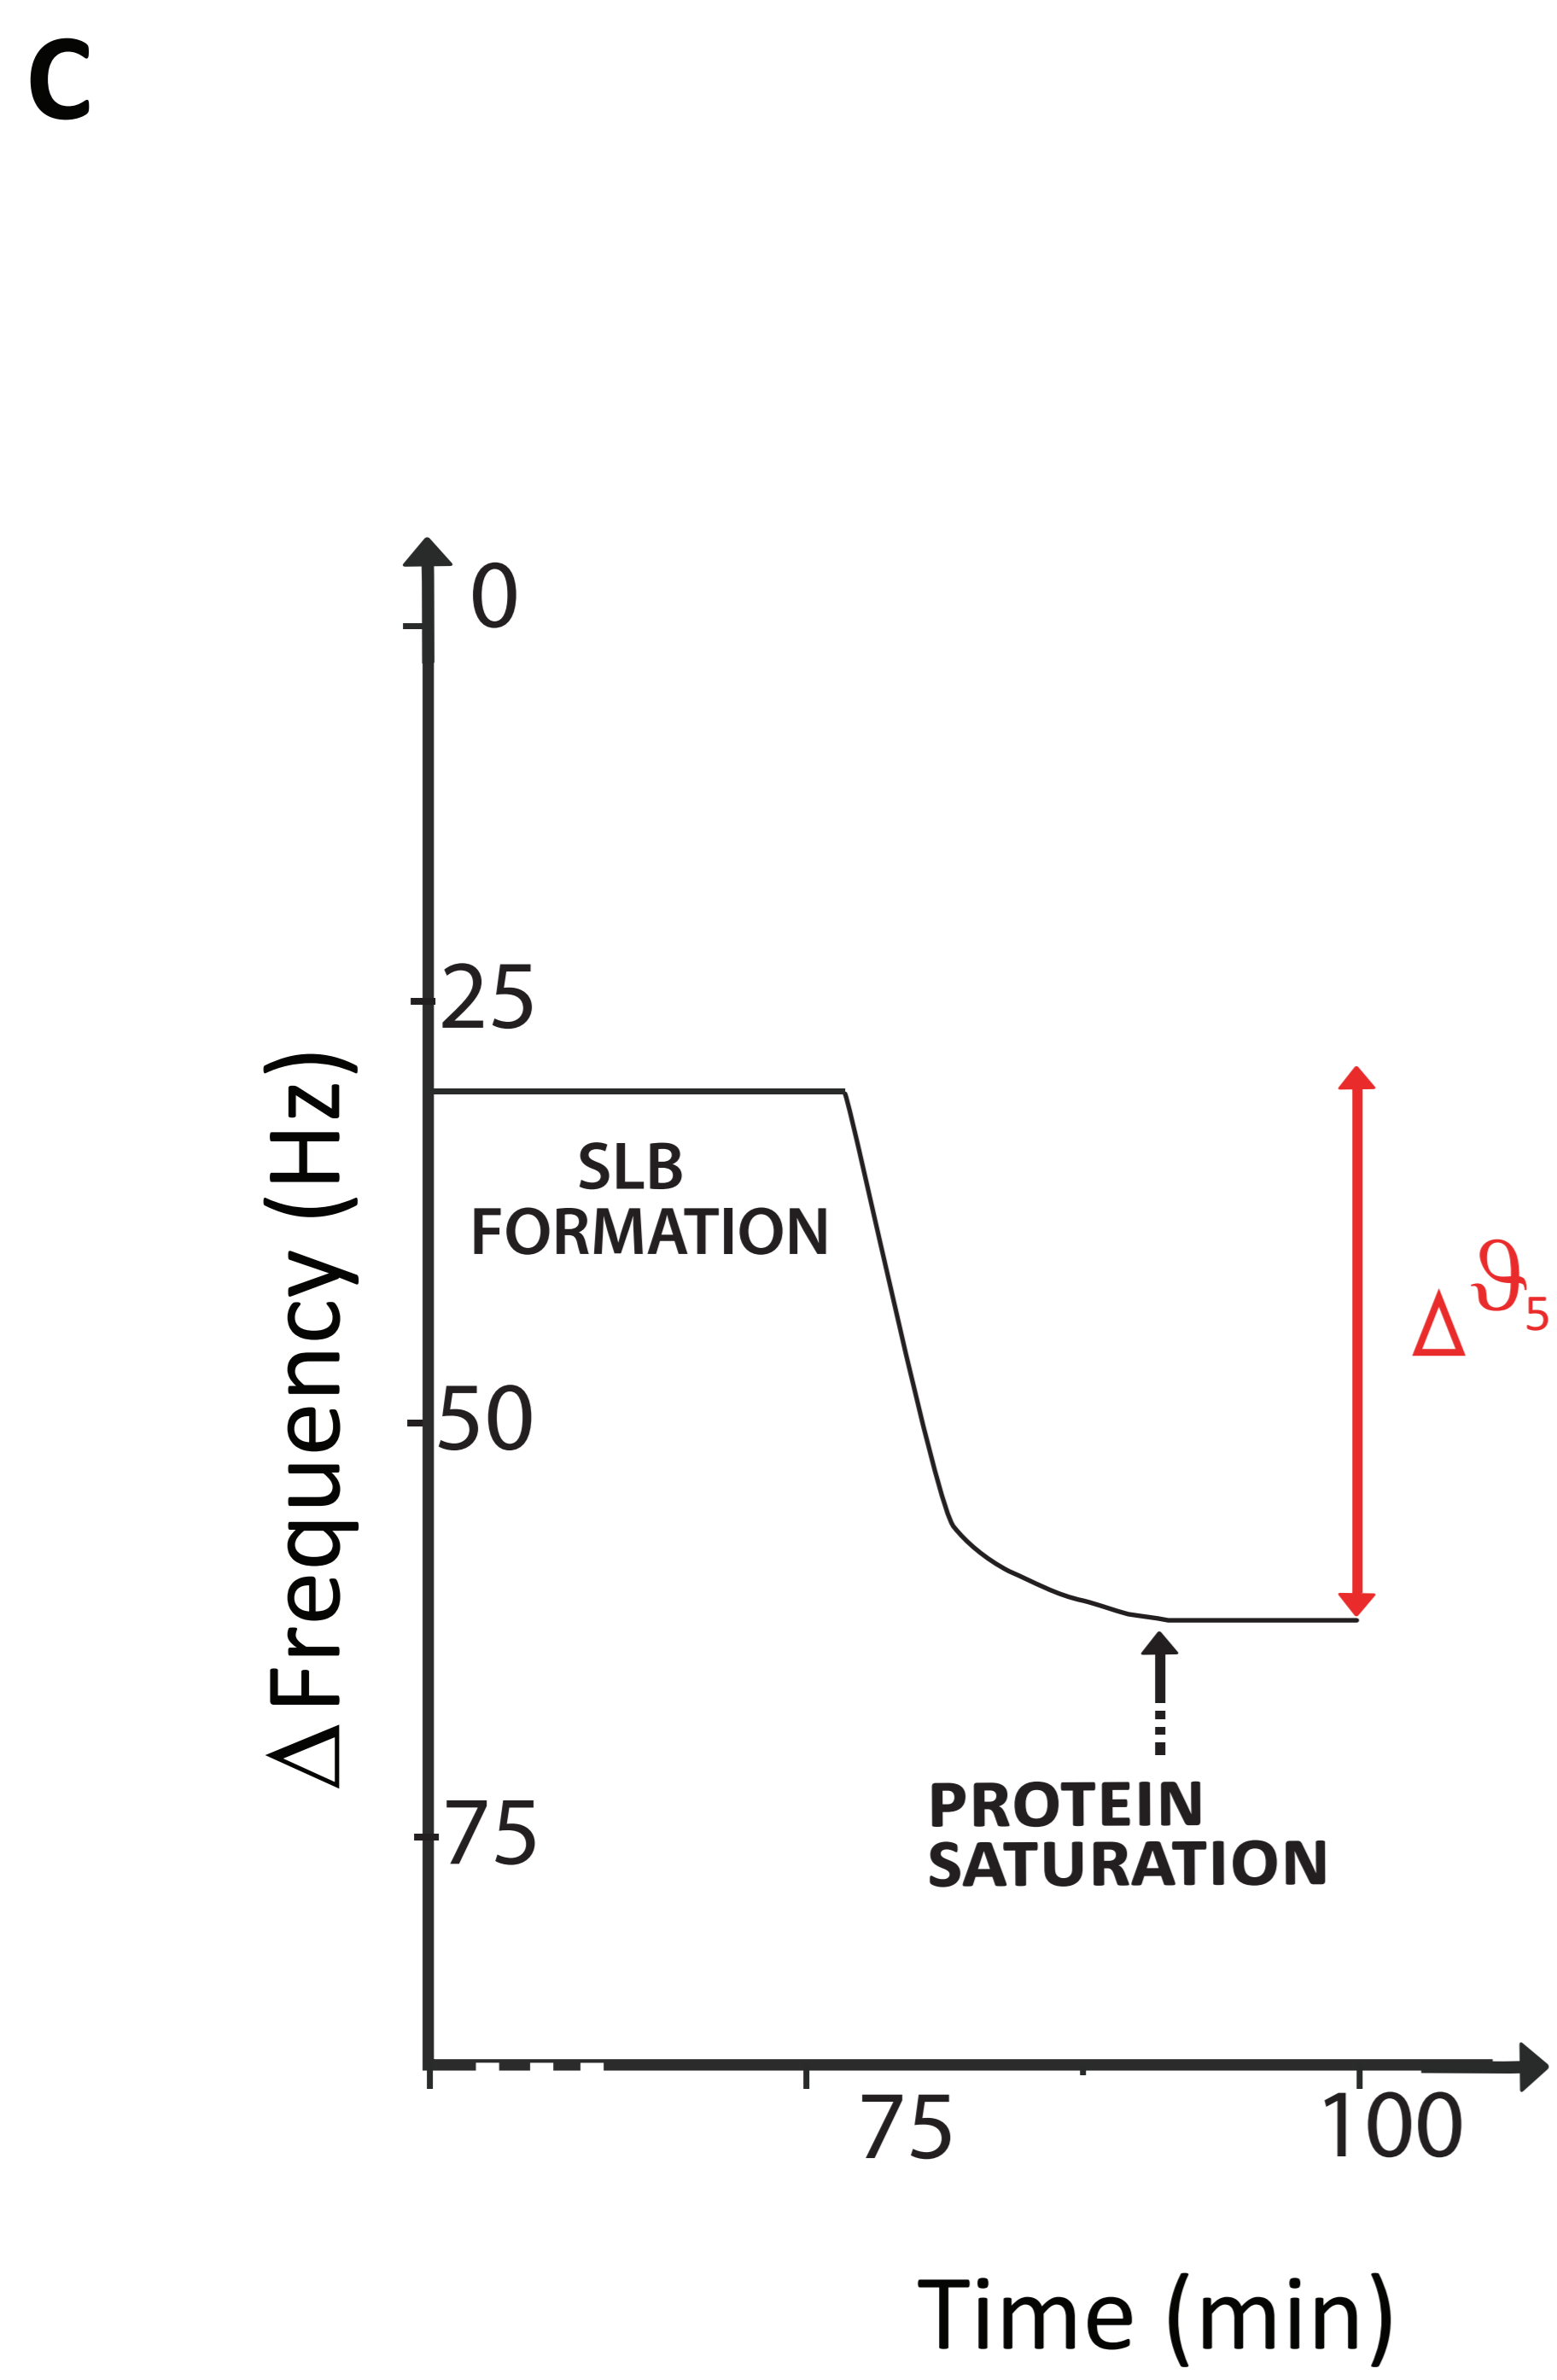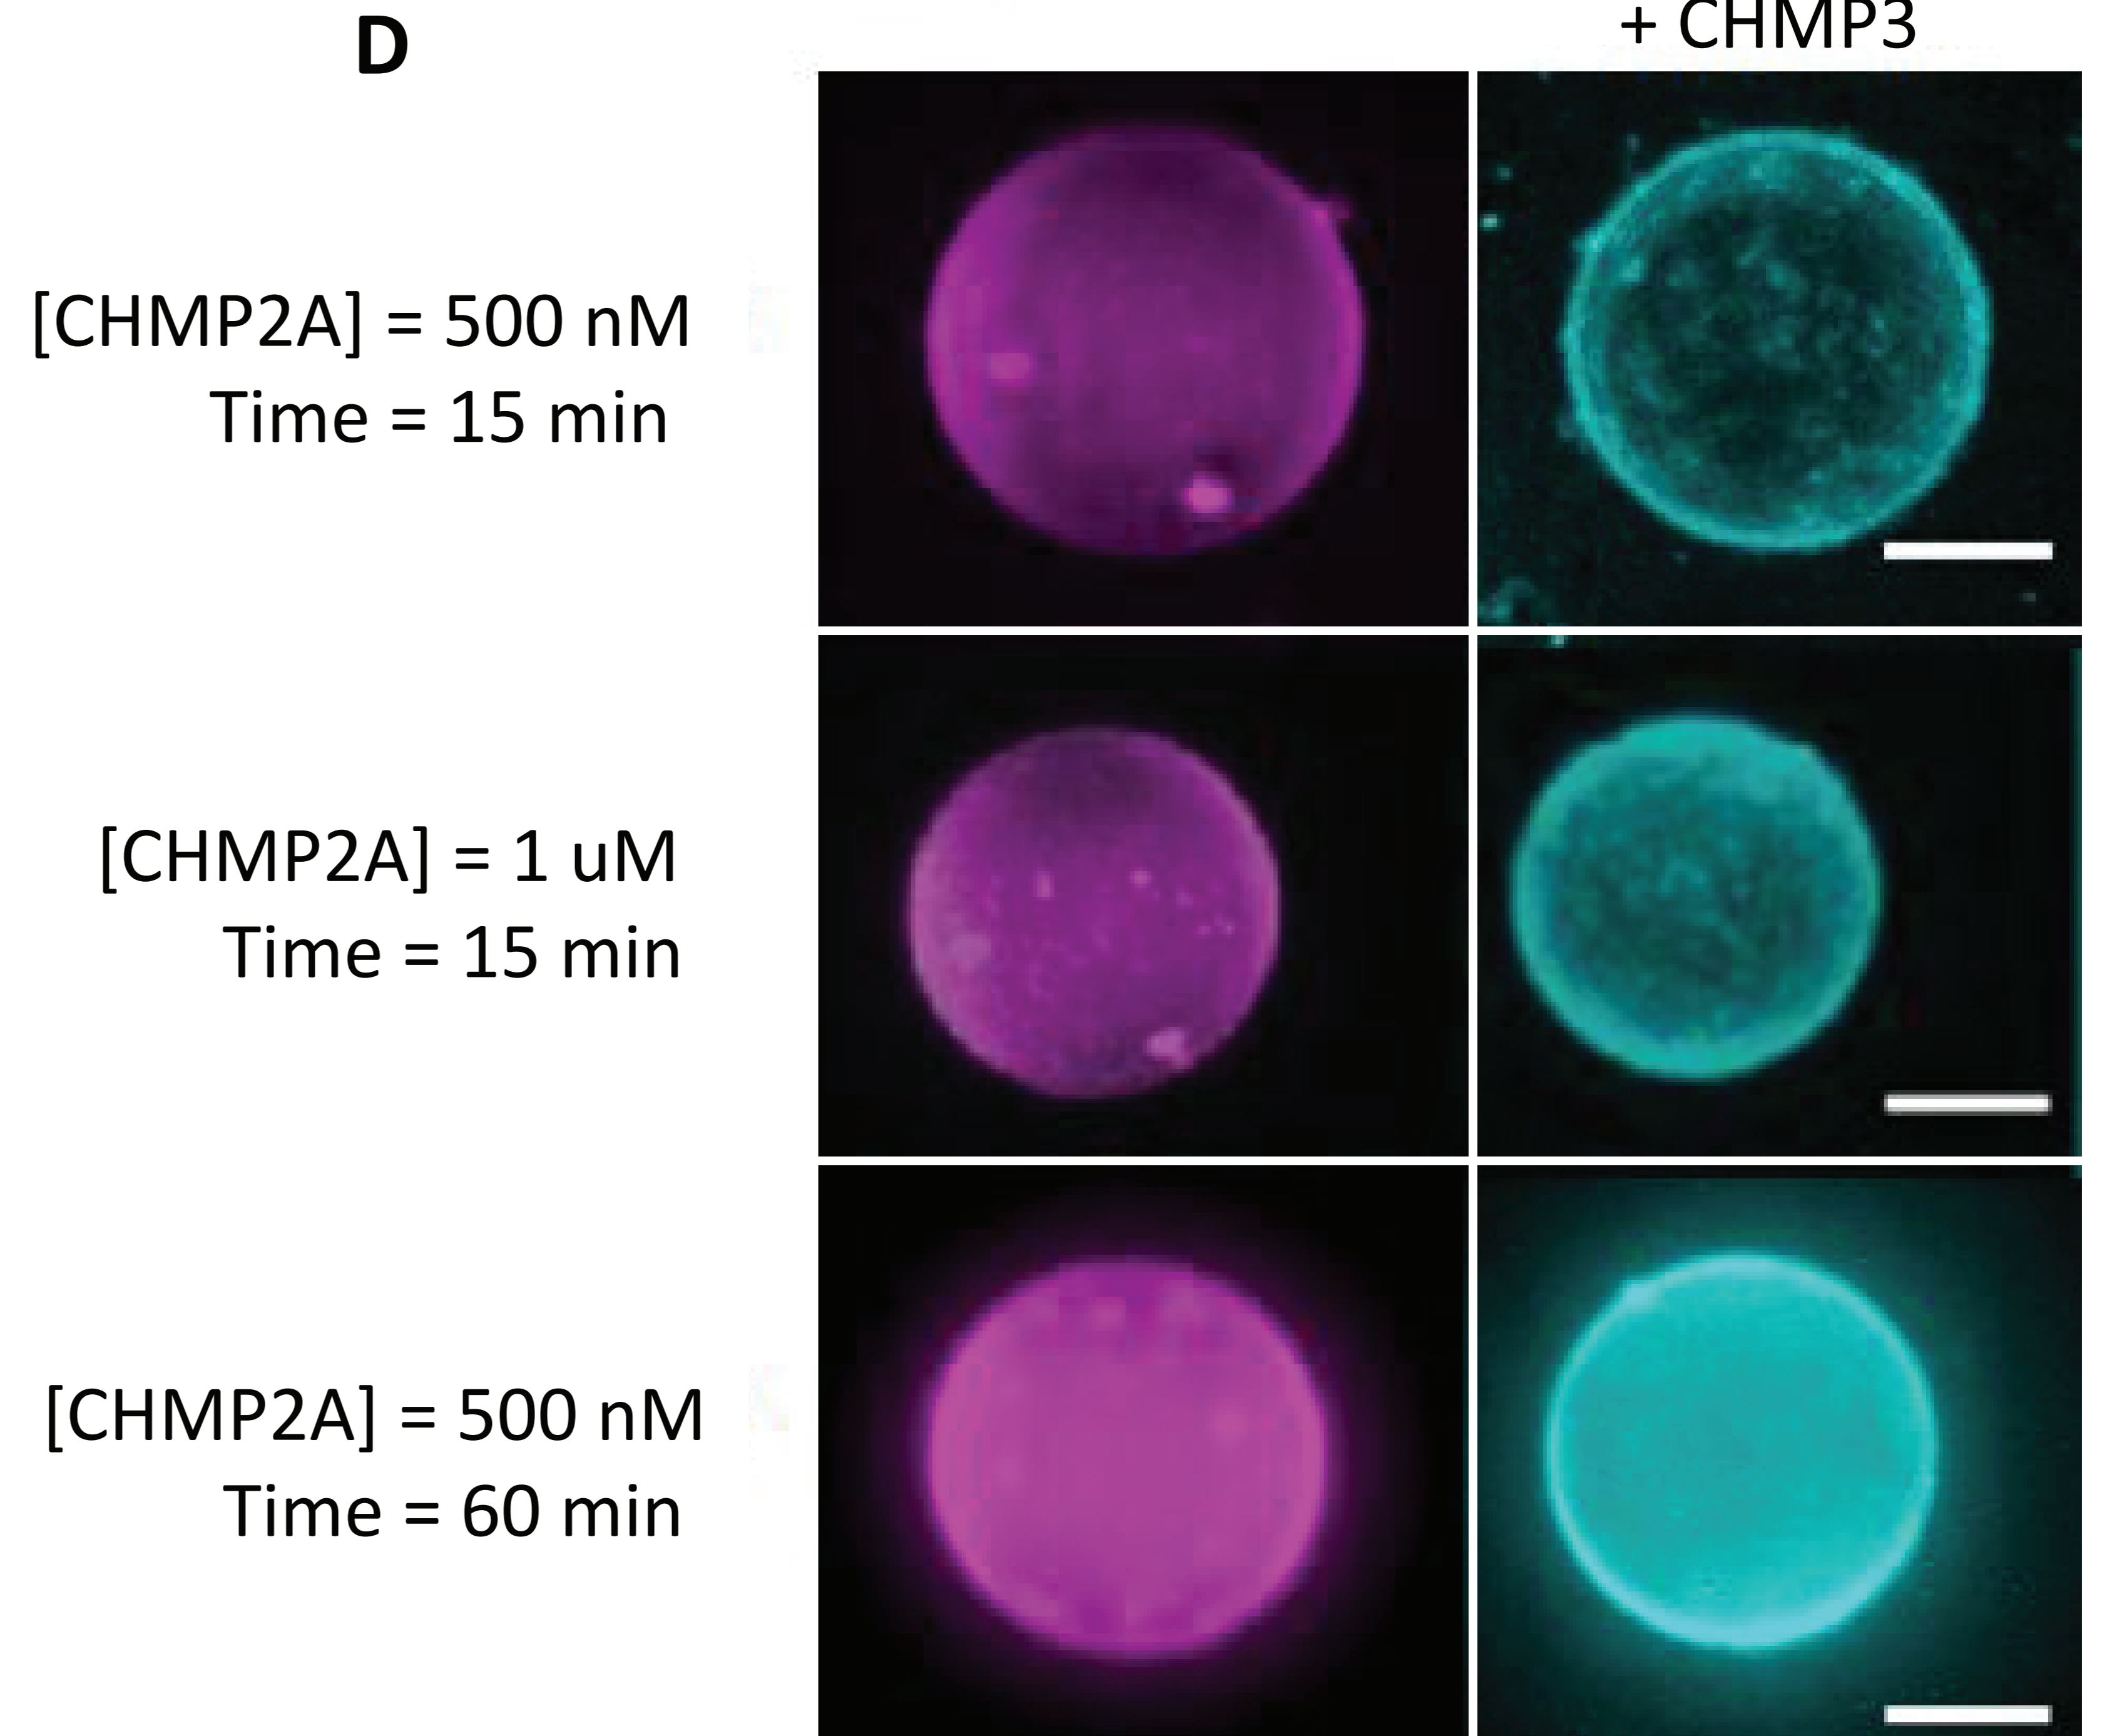

Supplement: 12915_2021_983_MOESM3_ESM.pdf [file 12915_2021_983_MOESM3_ESM.pdf]
