# Supplementary material for: The ESCRT-III isoforms CHMP2A and CHMP2B display different effects on membranes upon polymerization
Source: PubMed Central journal article supplement (PMC8033747; doi:10.1186/s12915-021-00983-9), 2021-04-08
Supplement: 12915_2021_983_MOESM4_ESM.pdf [file 12915_2021_983_MOESM4_ESM.pdf]

**SUV + CHMP2A + CHMP3**

**SUV + CHMP2B + CHMP3**

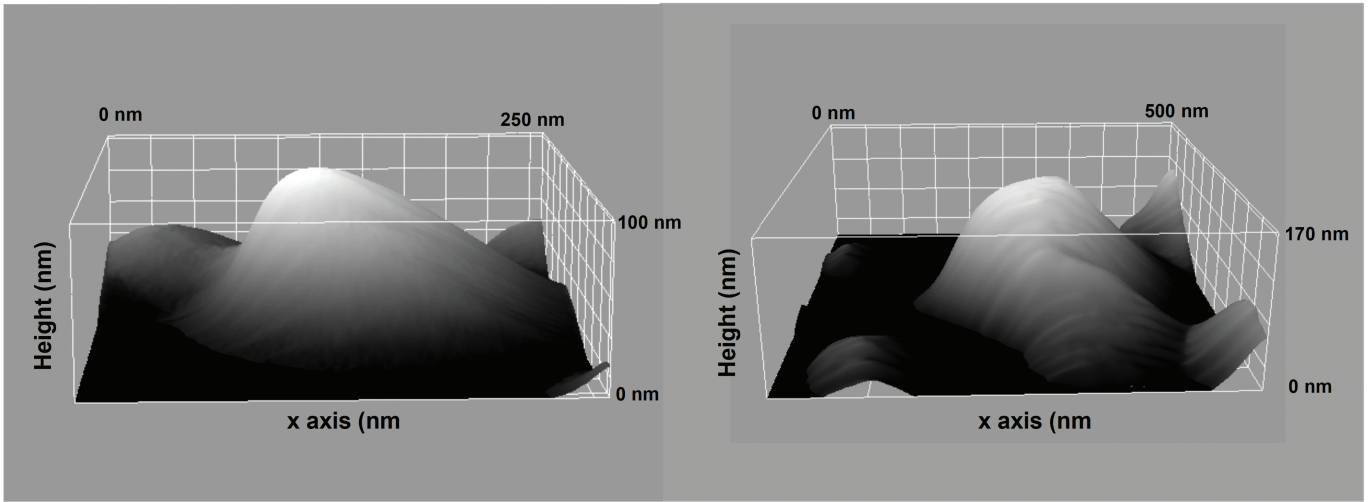

**Minimum force**

**Minimum force**

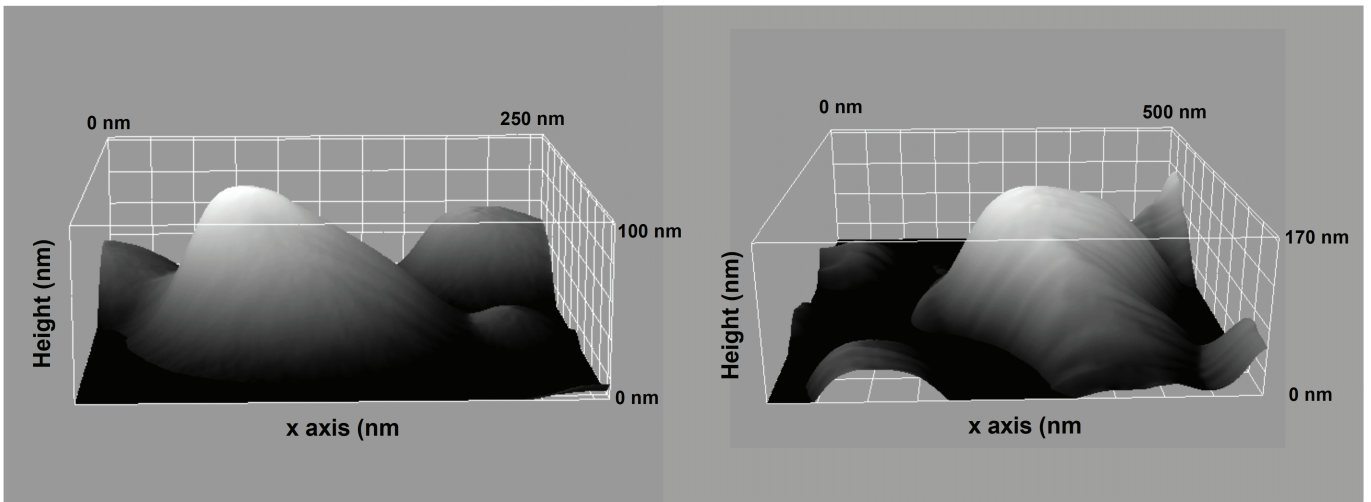

**27% force increment**

**27% force increment**

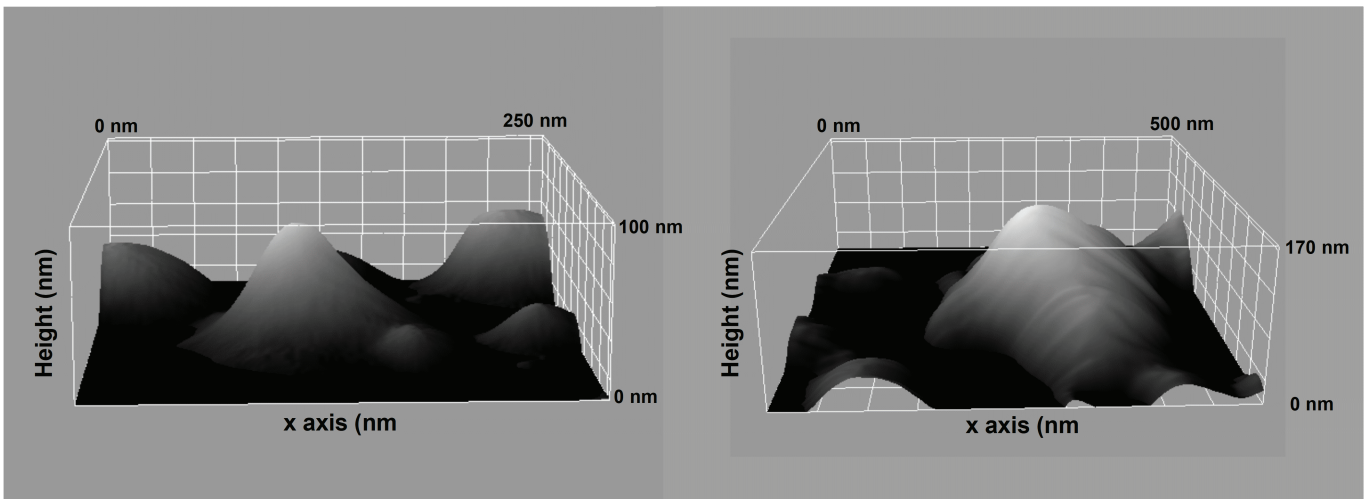

**81% force increment**

**81% force increment**
